# Supplementary material for: Mindfulness-Oriented Recovery Enhancement for Veterans and Military Personnel on Long-Term Opioid Therapy for Chronic Pain: A Randomized Clinical Trial
Source: Atypon-hosted journal article supplement (doi:10.1176/appi.ajp.20230272), 2024-01-10
Supplement: appi.ajp.20230272.ds001.pdf [file appi.ajp.20230272.ds001.pdf]

 


Psychiatry Online
